# Supplementary material for: The effects of the increasing number of the same chromophore on photosensitization of water-soluble cyclen-based europium complexes with potential for biological applications
Source: Royal Society of Chemistry journal article supplement (doi:10.1039/c4ra16536e), 2015-01-01
Supplement: c4ra16536e1.pdf [file c4ra16536e1.pdf]

## Supplementary Information

### The Effects of the Increasing Number of the Same Chromophore on Photosensitization of Water-Soluble Cyclen-based Europium Complexes with Potentials for Biological Applications

Zhenhao Liang,<sup>[a]</sup> Chi-Fai Chan,<sup>[c]</sup> Yurong Liu,<sup>[a]</sup> Wing-Tak Wong,<sup>\*,[b]</sup> Chi-Sing  
Lee,<sup>\*,[a]</sup> Ga-Lai Law,<sup>\*,[b]</sup> and Ka-Leung Wong<sup>\*,[c]</sup>

[a] Laboratory of Chemical Genomics, School of Chemical Biology and  
Biotechnology, Peking University Shenzhen Graduate School, Shenzhen University  
Town, Xili, Shenzhen 518055, China

[b] Department of Applied Biological and Chemical Technology, Hong Kong  
Polytechnic University, Hung Hum, Hong Kong SAR

[c] Department of Chemistry, Hong Kong Baptist University, Hong Kong SAR

#### Table of Contents

|                                                                                                                                                  |         |
|--------------------------------------------------------------------------------------------------------------------------------------------------|---------|
| <sup>1</sup> H and <sup>13</sup> C NMR spectra of compounds <b>2</b> and ligands 1-4L.....                                                       | S2–S7   |
| <sup>1</sup> H NMR spectra of Eu-1L, Eu-o-2L and Eu-3L.....                                                                                      | S8      |
| HMRS of 1L-4L and the corresponding Ln (Eu and Gd) complexes.....                                                                                | S9–S13  |
| <b>Table S1</b> and <b>Fig. S1</b> HPLC analysis of the Eu complexes.....                                                                        | S14     |
| FT-IR spectra of complexes Eu-nL (n = 1, o-2 p-2, 3 and 4).....                                                                                  | S15–S16 |
| <b>Fig. S2</b> UV absorption spectra of ligands 1-4L.....                                                                                        | S17     |
| <b>Fig. S3-S7</b> Extinction coefficient of five Eu complexes.....                                                                               | S17–S18 |
| <b>Fig. S8</b> Plot of intensity ( <sup>5</sup> D <sub>0</sub> to <sup>7</sup> F <sub>2</sub> ) <i>versus</i> pH of five europium complexes..... | S19     |

**$^1\text{H}$  NMR (400 MHz,  $\text{CDCl}_3$ ) and  $^{13}\text{C}$  NMR (100 MHz,  $\text{CDCl}_3$ ) of Compound 2**

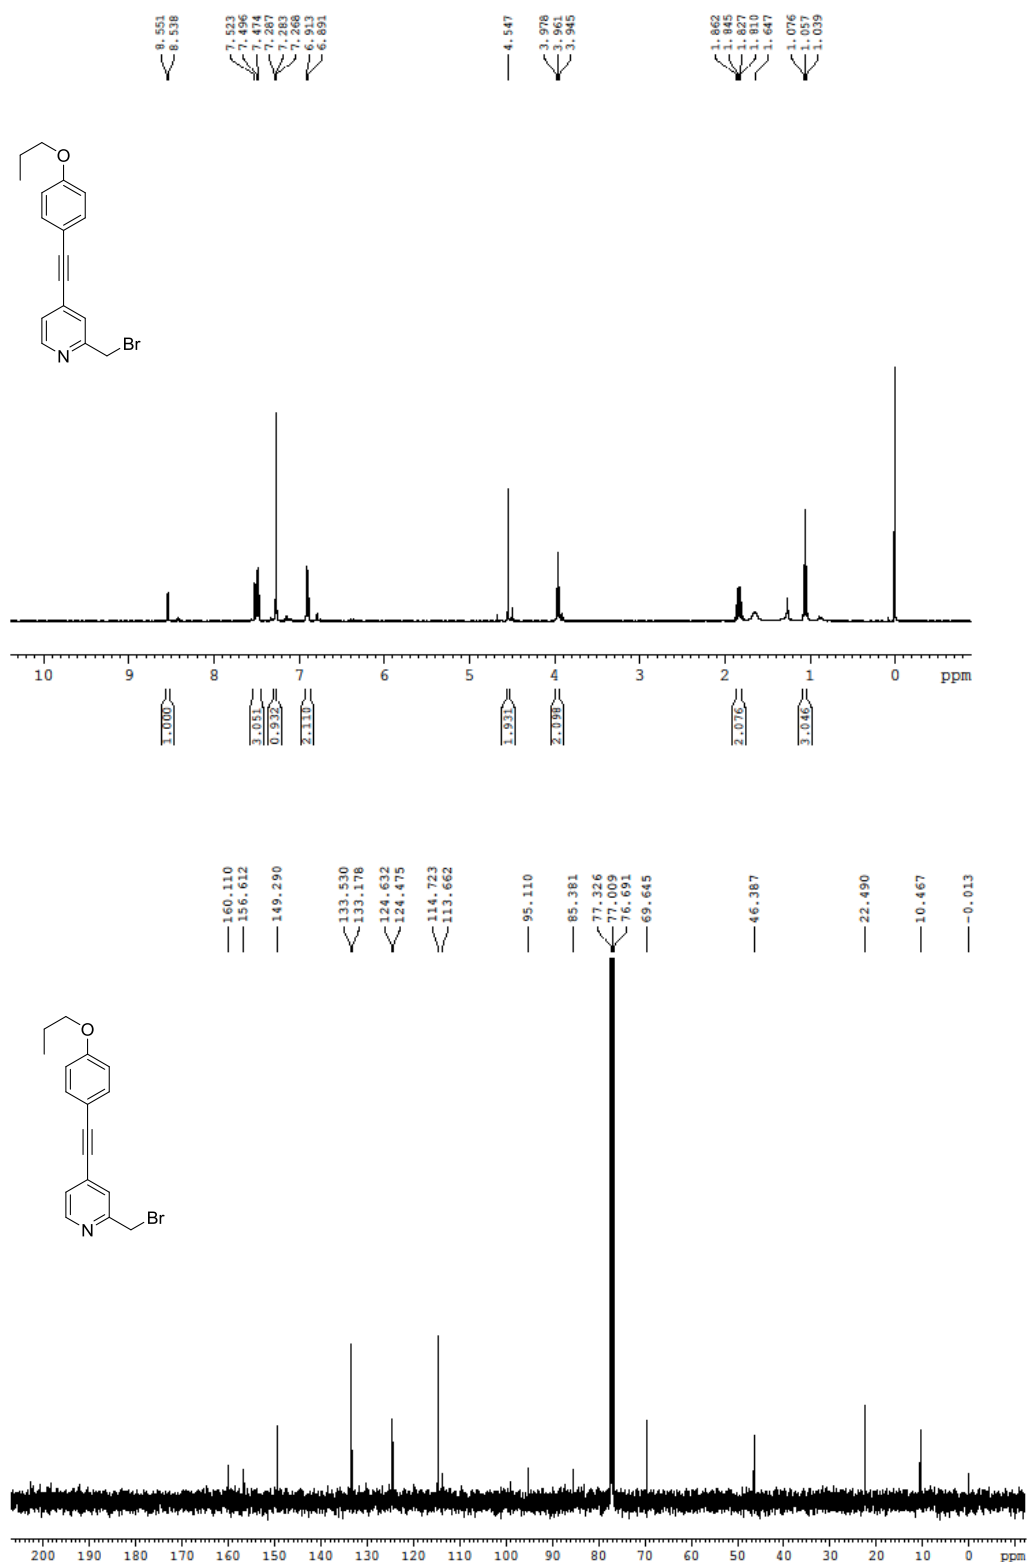

<sup>1</sup>H NMR (500 MHz, CDCl<sub>3</sub>) and <sup>13</sup>C NMR (125 MHz, CDCl<sub>3</sub>) of Ligand 1L

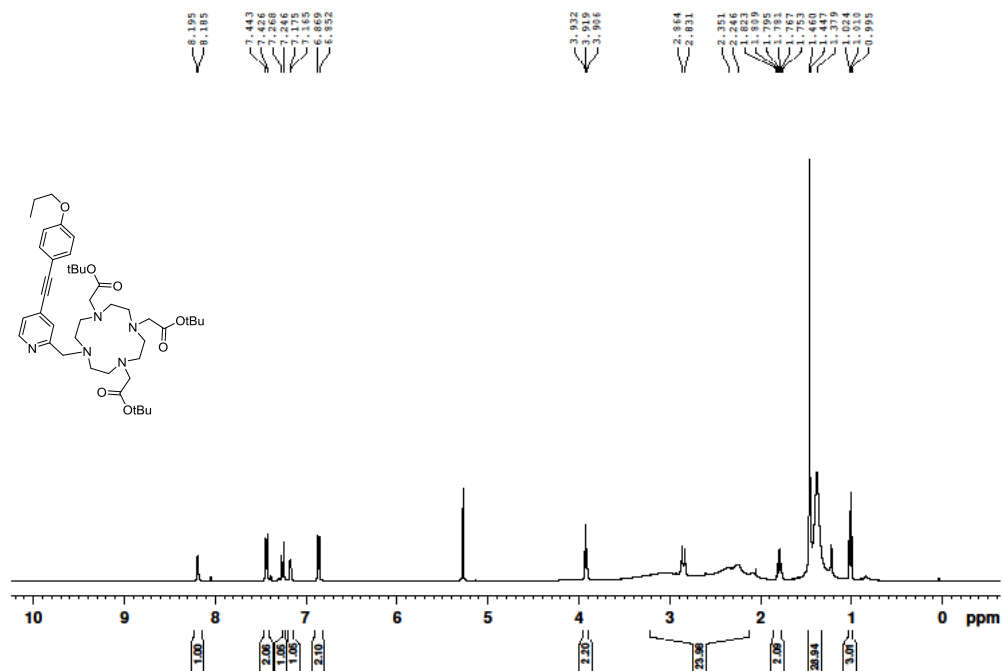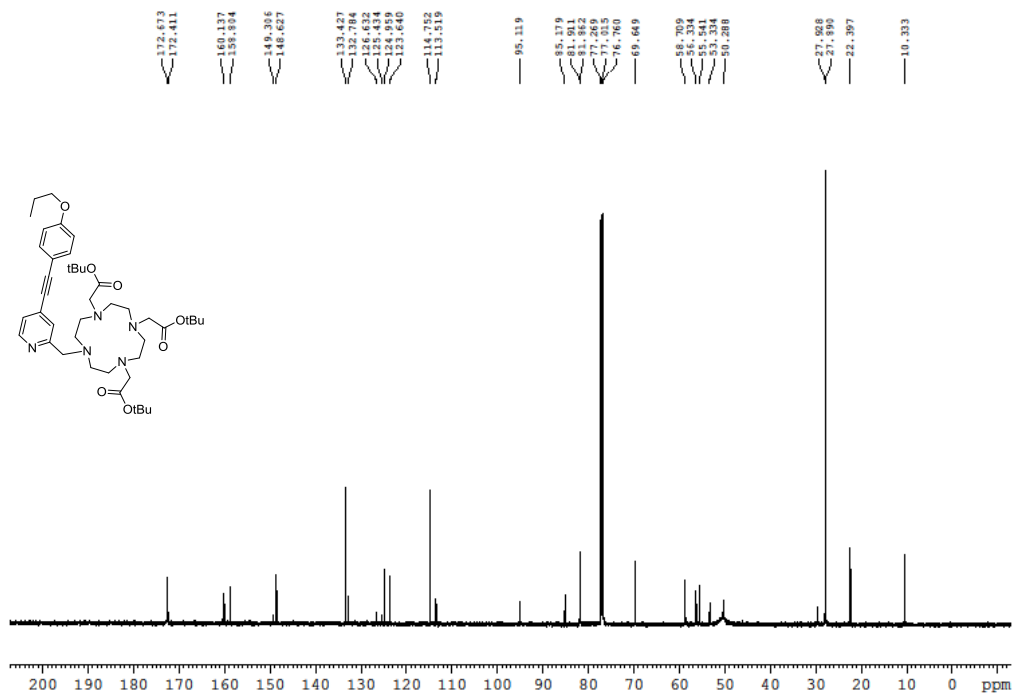

<sup>1</sup>H NMR (400 MHz, CDCl<sub>3</sub>) and <sup>13</sup>C NMR (100 MHz, CDCl<sub>3</sub>) of Ligand p-2L

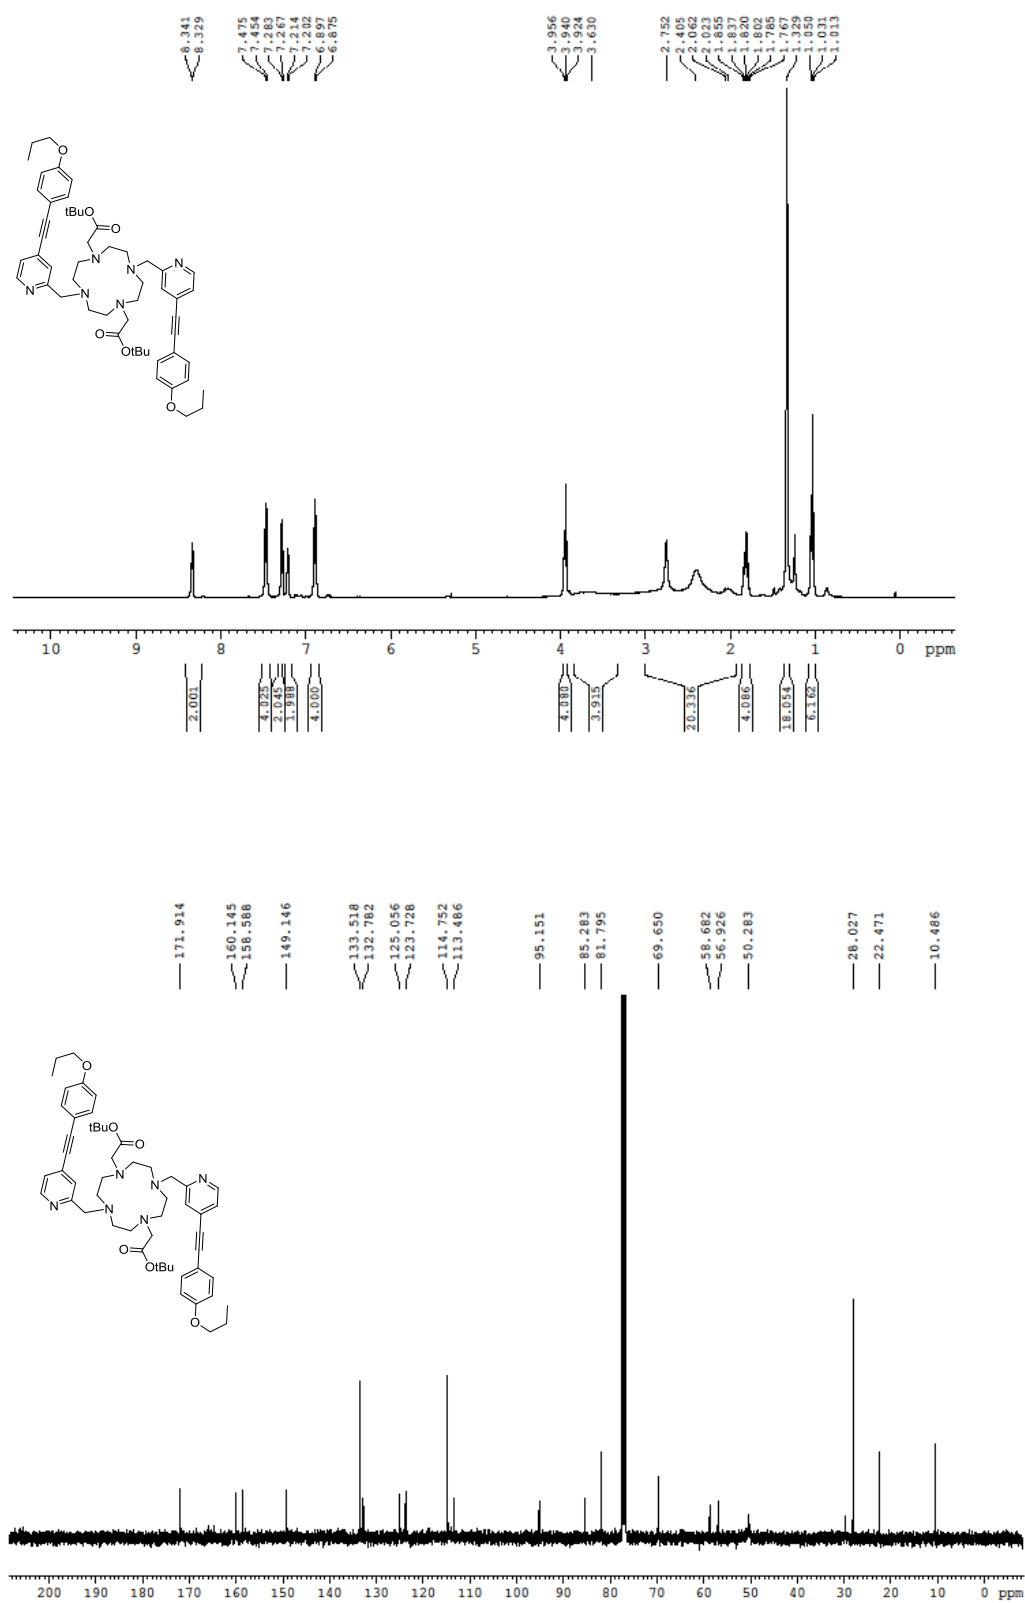

$^1\text{H}$  NMR (400 MHz,  $\text{CDCl}_3$ ) and  $^{13}\text{C}$  NMR (75 MHz,  $\text{CD}_3\text{OD}$ ) of Ligand o-2L

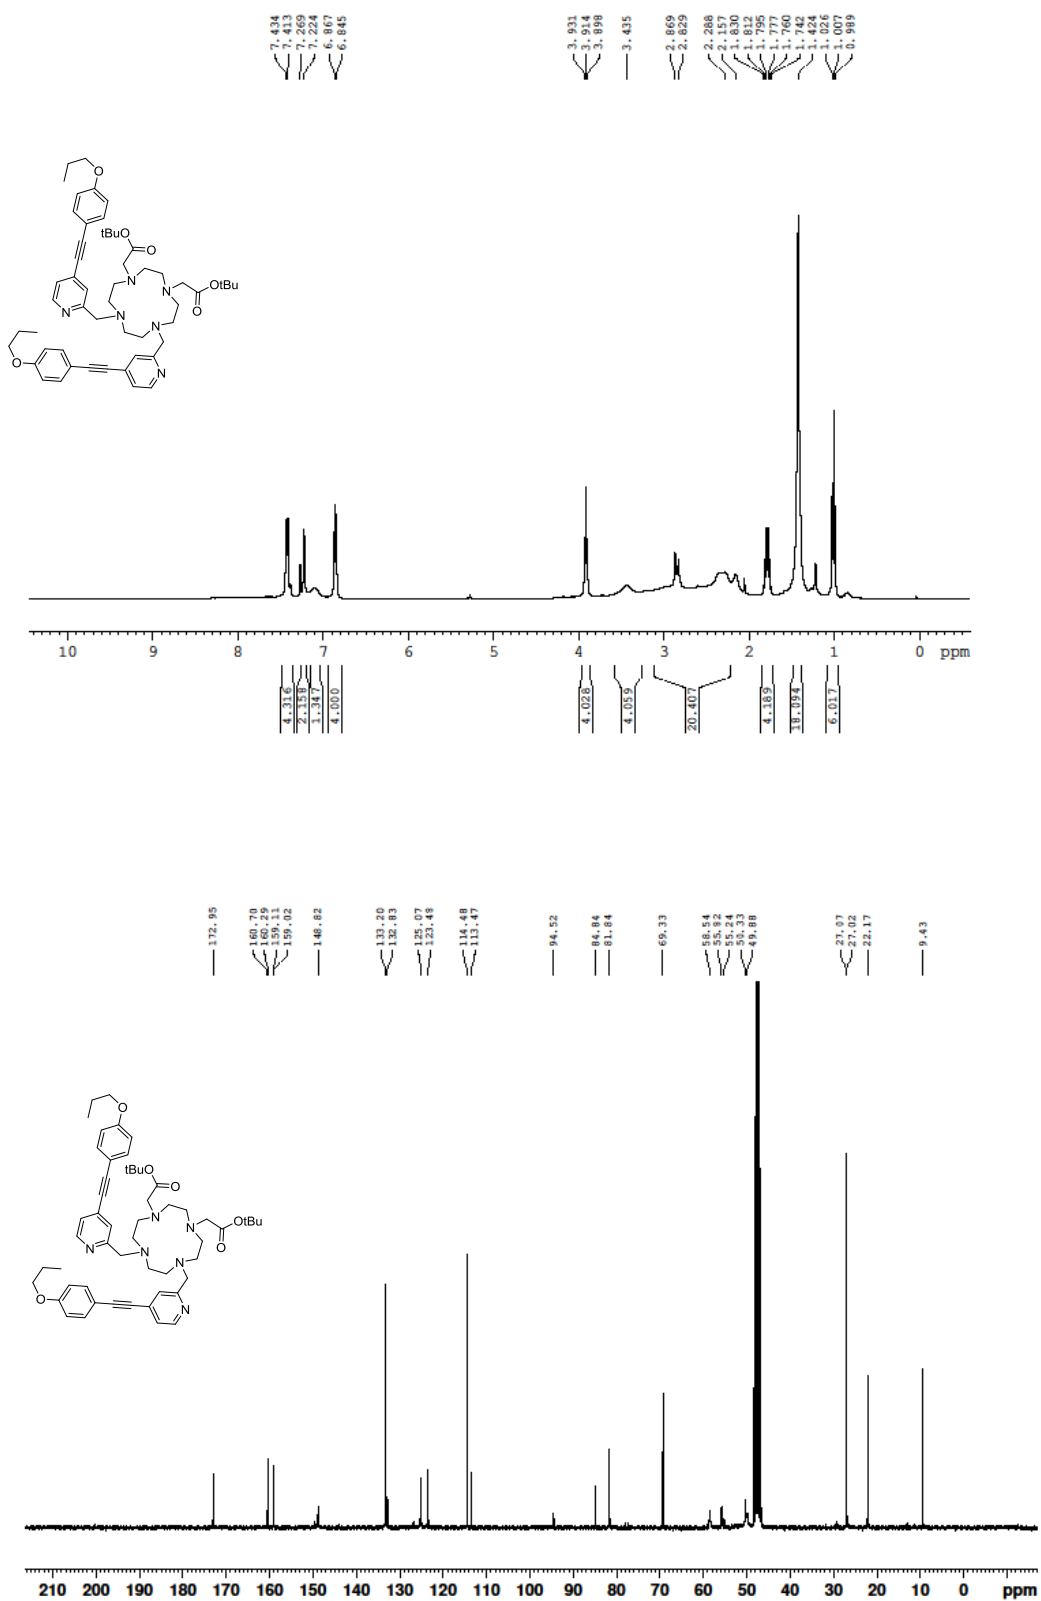

$^1\text{H}$  NMR (500 MHz,  $\text{CDCl}_3$ ) and  $^{13}\text{C}$  NMR (125 MHz,  $\text{CDCl}_3$ ) of Ligand 3L

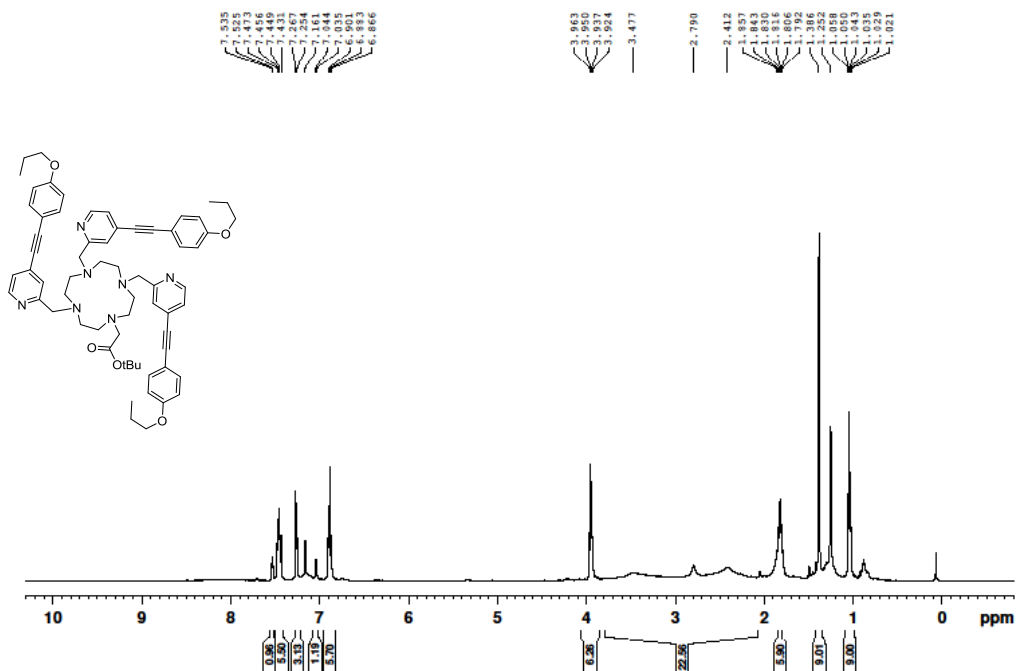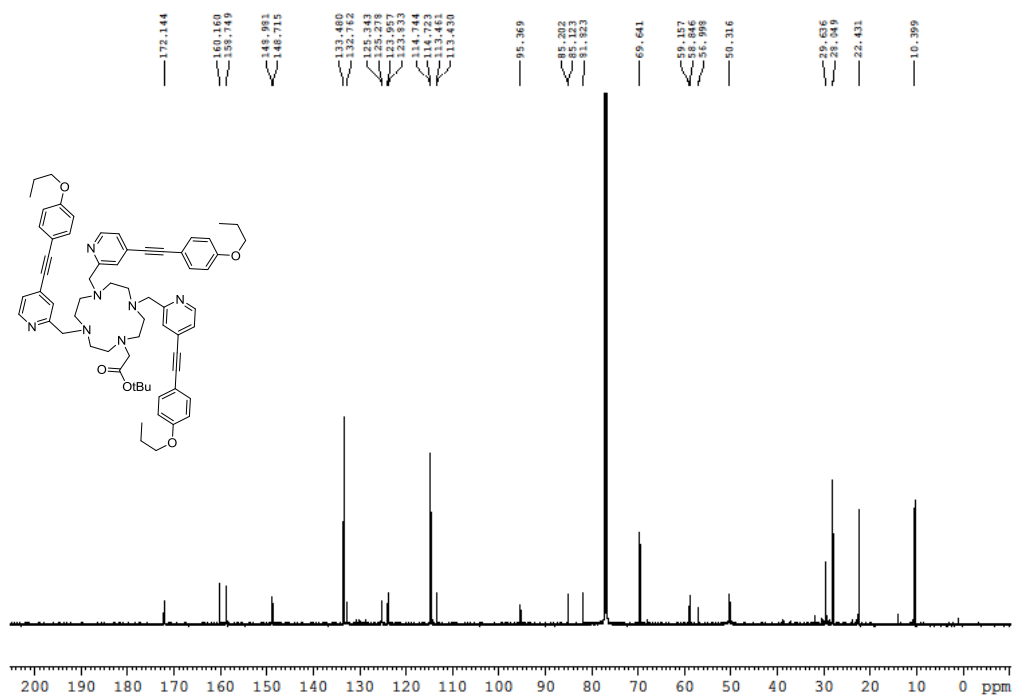

$^1\text{H}$  NMR (400 MHz,  $\text{CDCl}_3$ ) and  $^{13}\text{C}$  NMR (125 MHz,  $\text{CDCl}_3$ ) of Ligand 4L

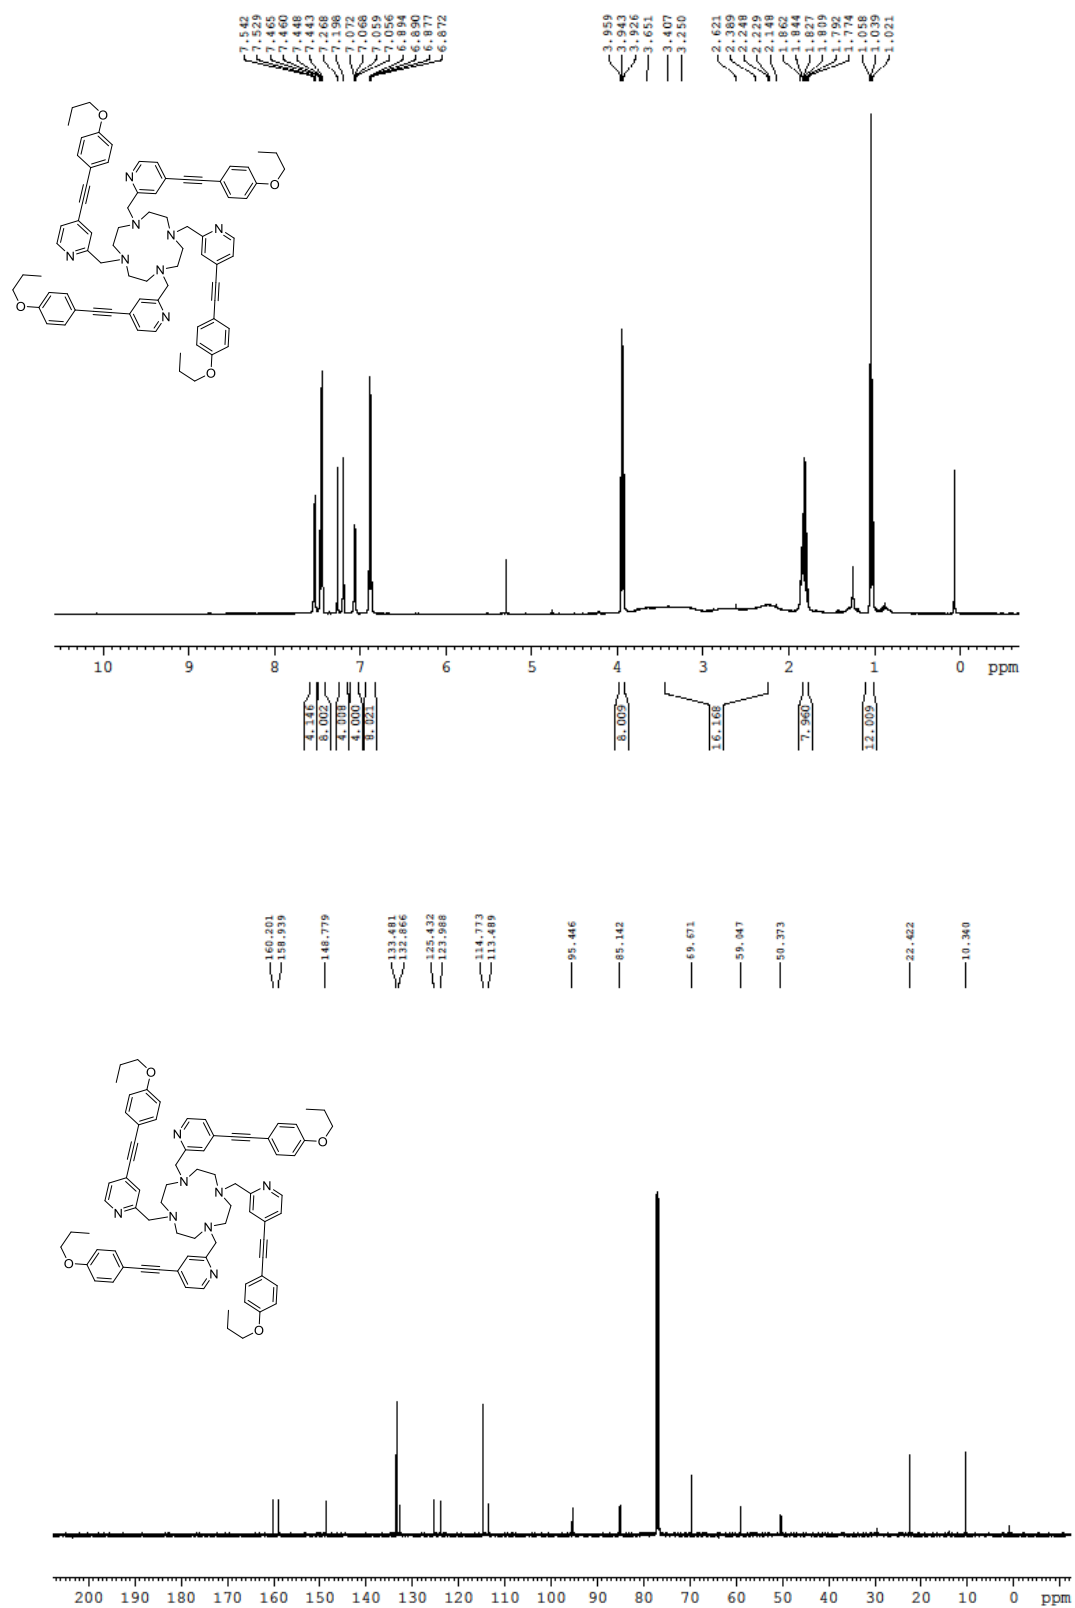

**$^1\text{H}$  NMR of Complexes Eu-nL (n = 1, o-2 and 3) in  $\text{CD}_3\text{OD}$  (500 MHz, 298 K) (top: Eu-1L, middle: Eu-o-2L and bottom: Eu-3L)**

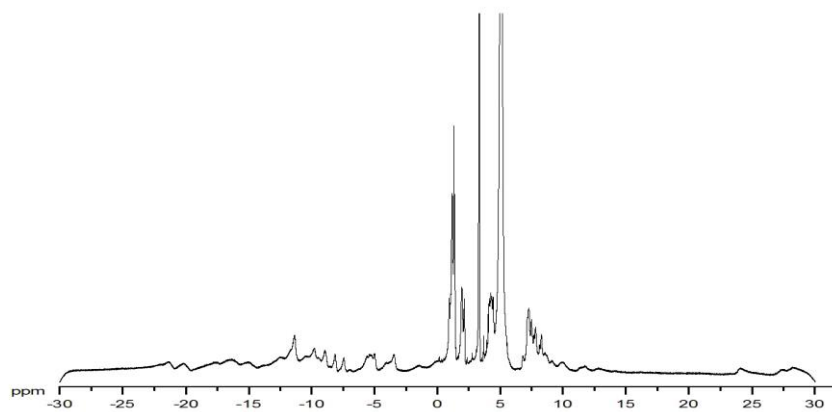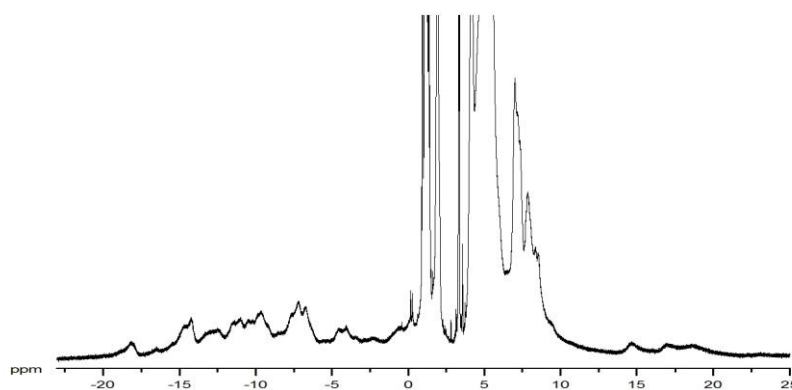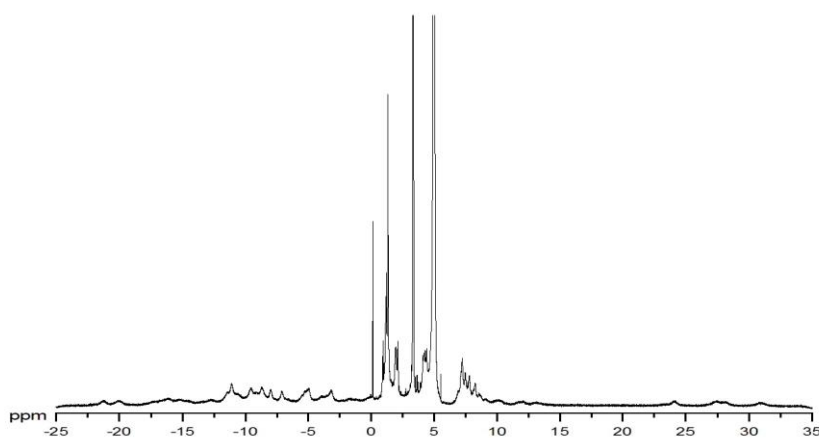



**HRMS of Ln (Eu, Gd) complexes and the corresponding ligand (Top: the isotopic pattern of Eu-1L; Middle: the isotopic pattern of Gd-1L; Bottom: ligand 1L)**

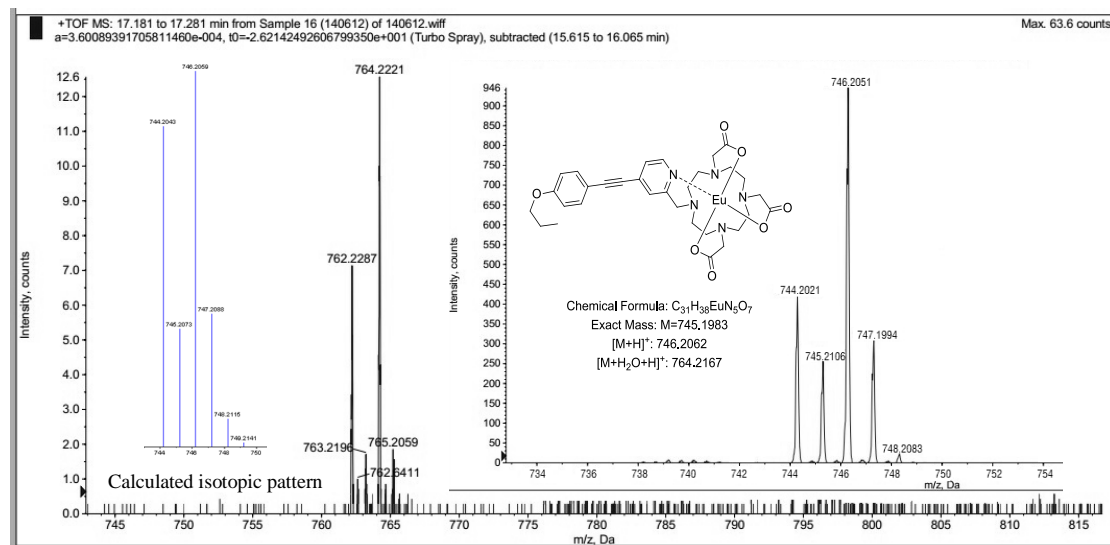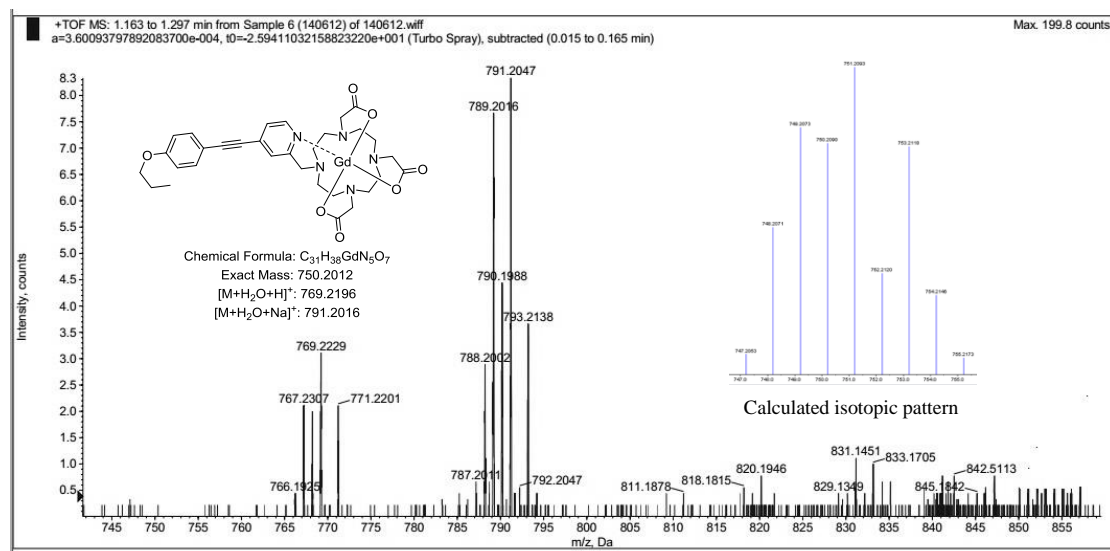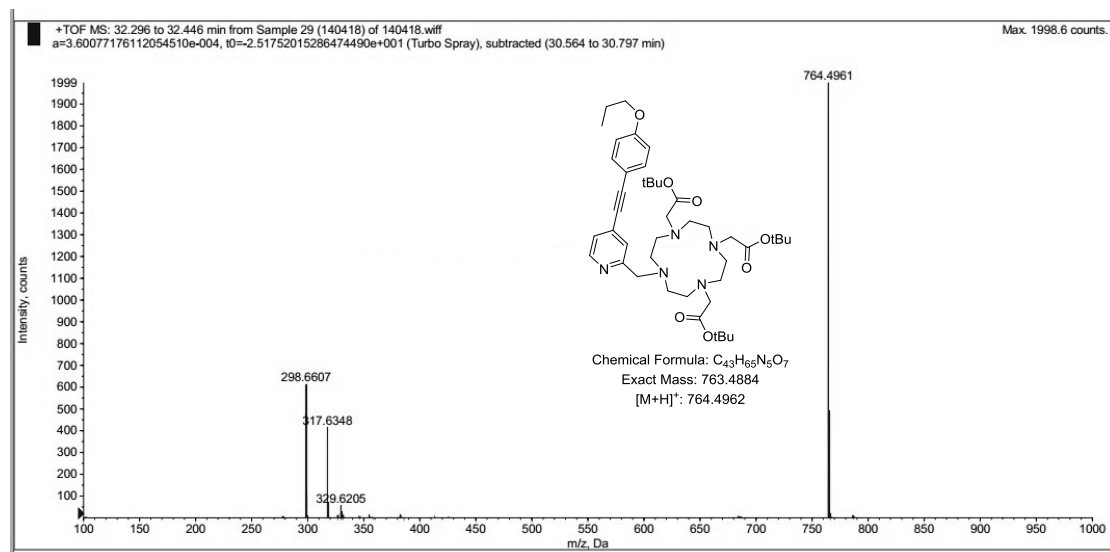

**HRMS of Ln (Eu, Gd) complexes and the corresponding ligand (Top: the isotopic pattern of Eu-o-2L; Middle: the isotopic pattern of Gd-o-2L; Bottom: ligand o-2L)**

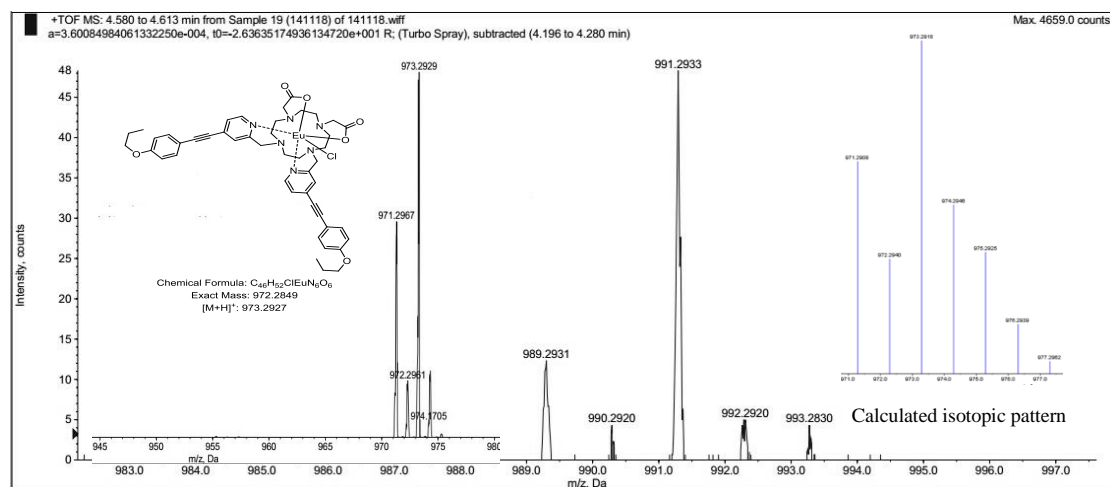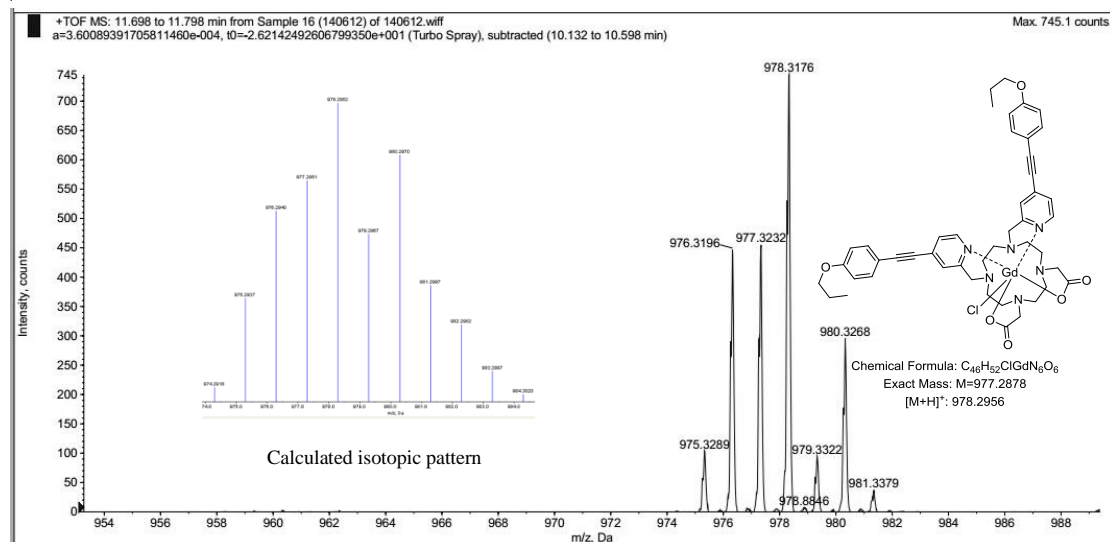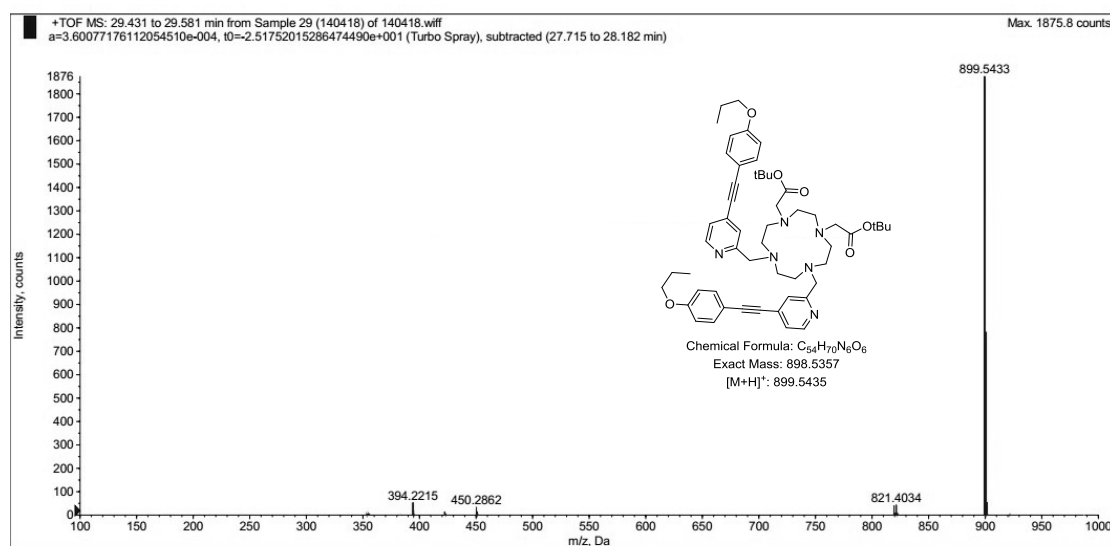

**HRMS of Ln (Eu, Gd) complexes and the corresponding ligand (Top: the isotopic pattern of Eu-p-2L; Middle: the isotopic pattern of Gd-p-2L; Bottom: ligand p-2L)**

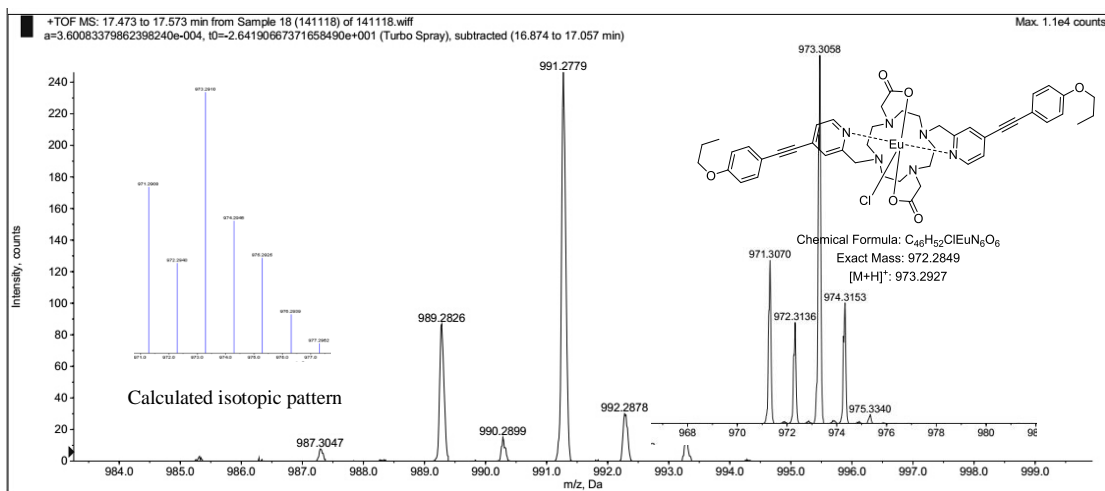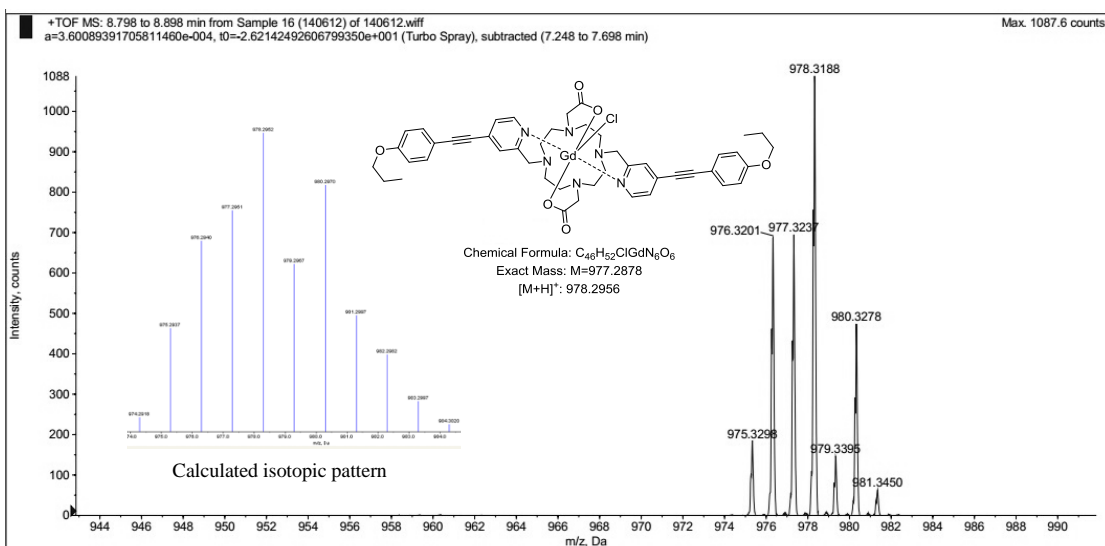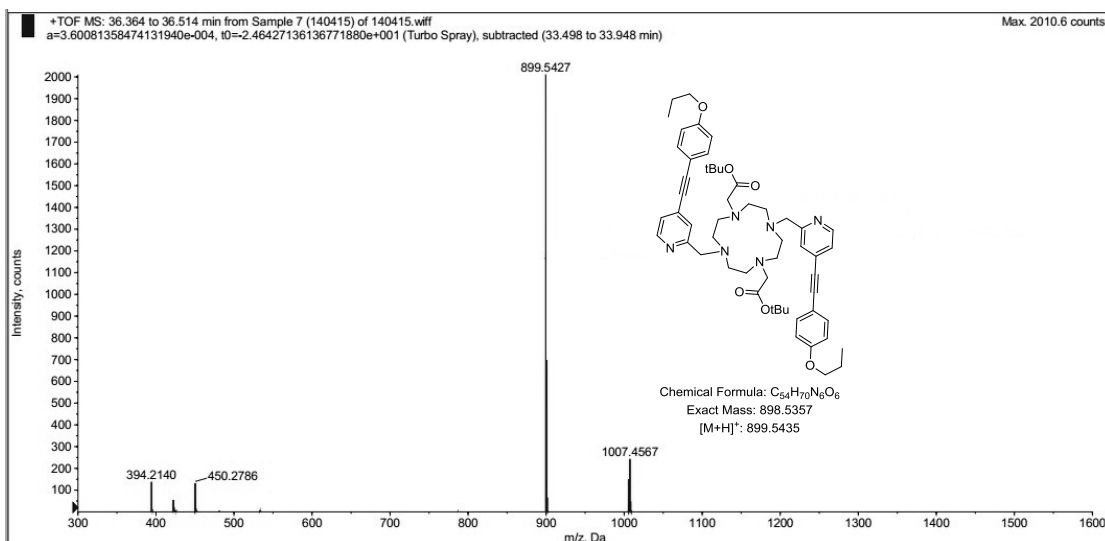

**HRMS of Ln (Eu, Gd) complexes and the corresponding ligand (Top: the isotopic pattern of Eu-3L; Middle: the isotopic pattern of Gd-3L; Down: ligand 3L)**

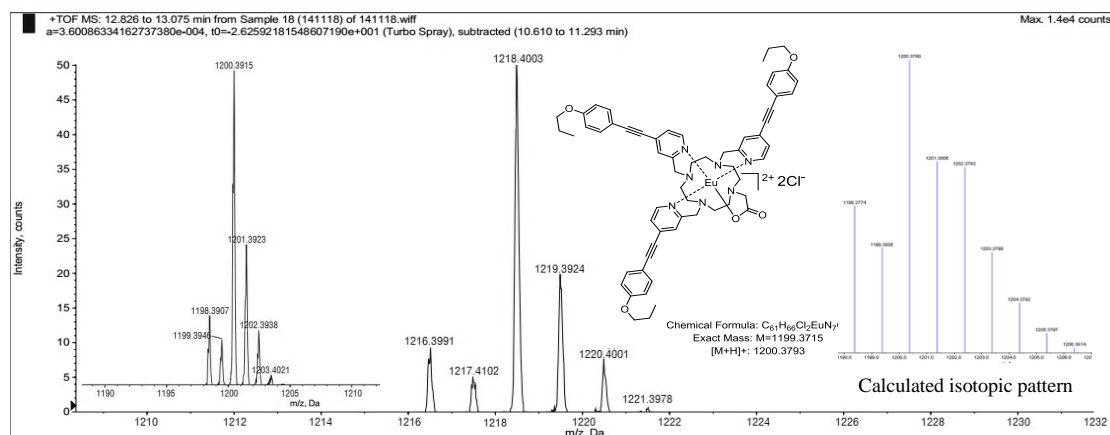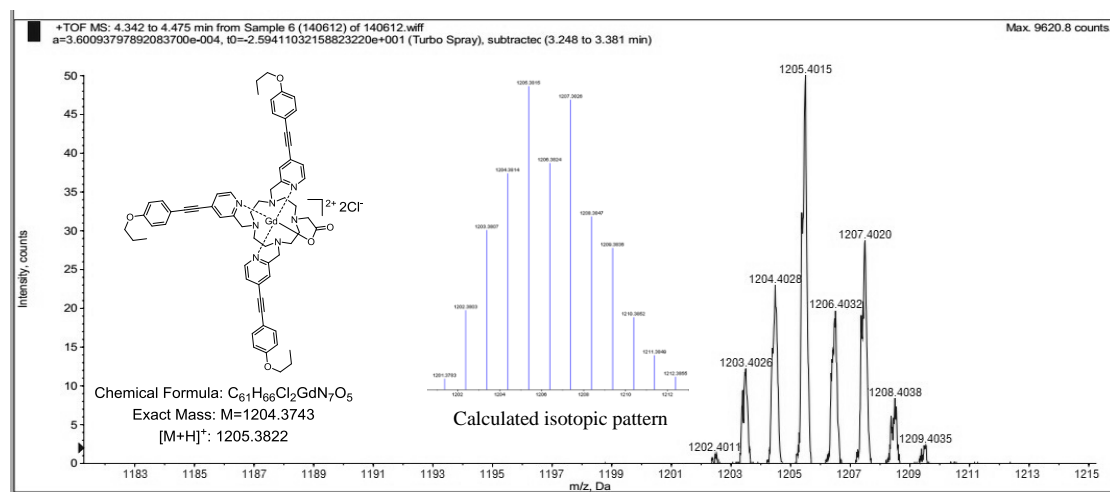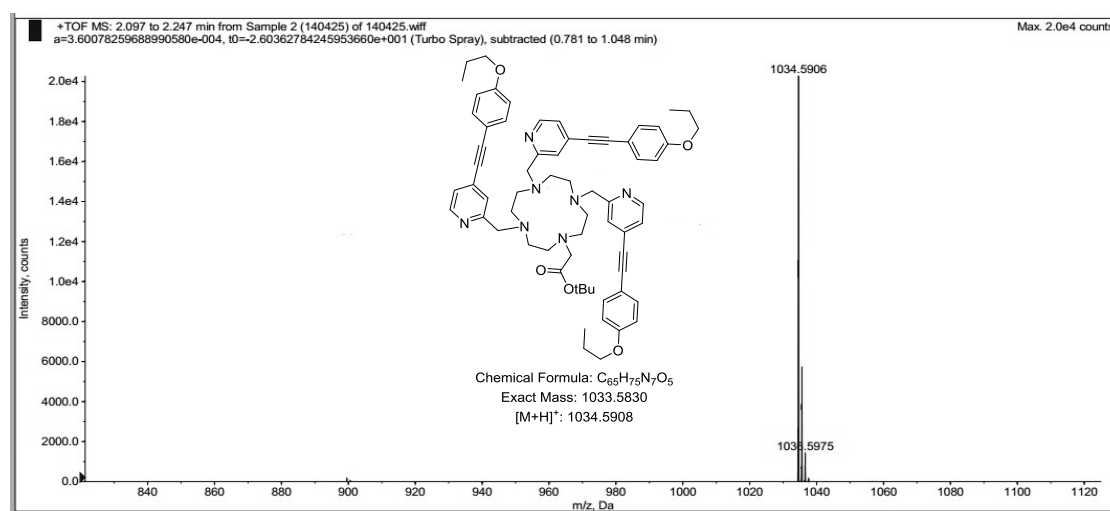

**HRMS of Ln (Eu, Gd) complexes and the corresponding ligand (Top: the isotopic pattern of Eu-4L; Middle: the isotopic pattern of Gd-4L; Bottom: ligand 4L)**

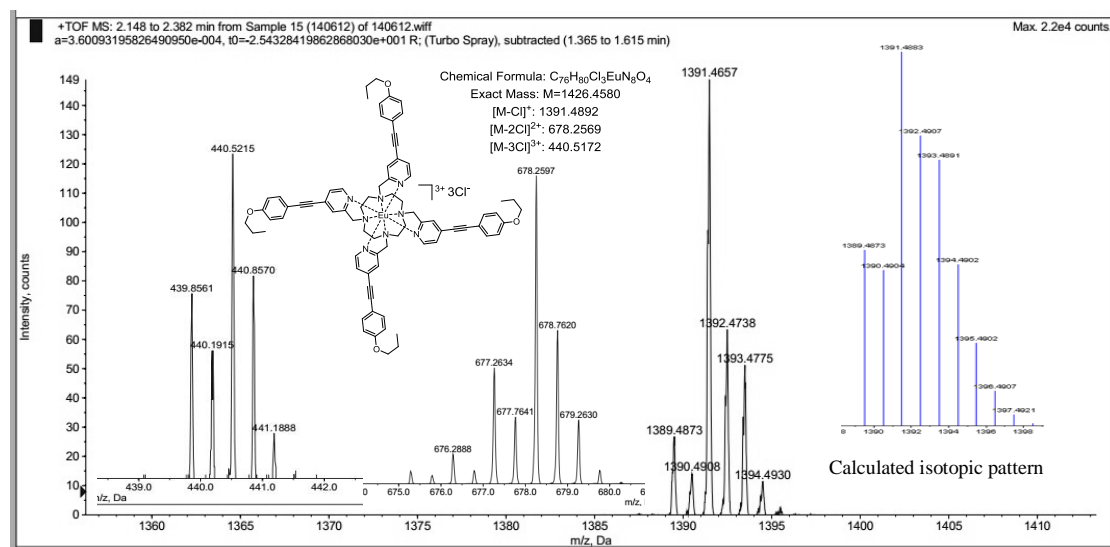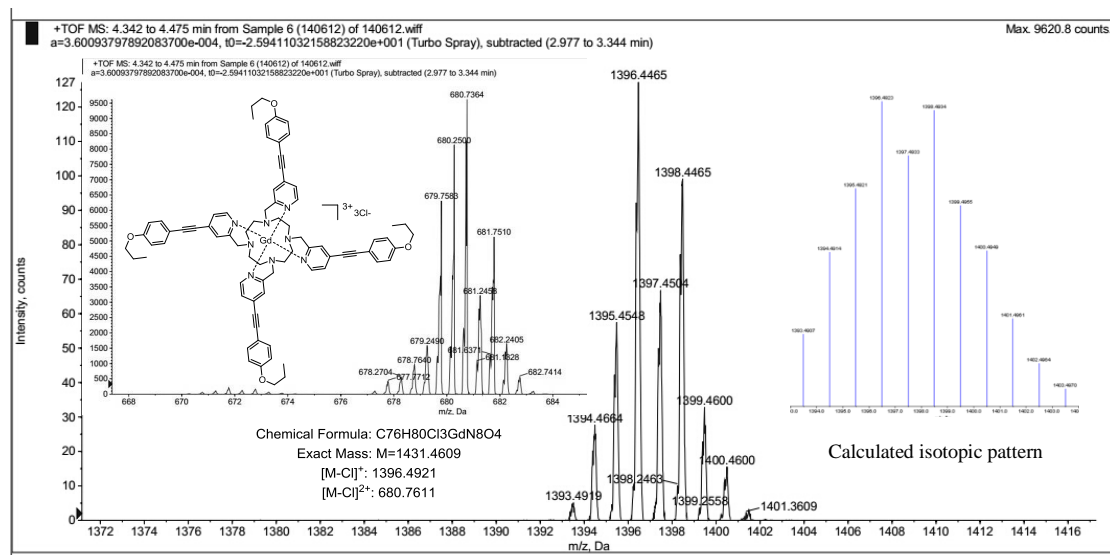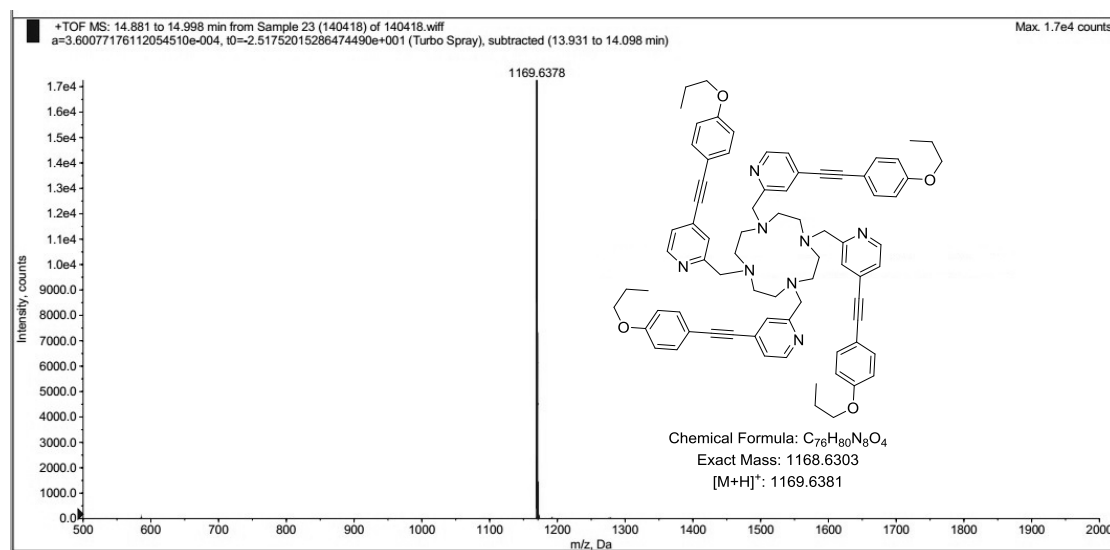

**Table S1** Solvent gradient for HPLC

| Time /min | 0.1% CHOOH in mQ water /% | 0.1% CHOOH in CH <sub>3</sub> CN /% |
|-----------|---------------------------|-------------------------------------|
| 0.0       | 95                        | 5                                   |
| 14.0      | 50                        | 50                                  |
| 15.0      | 50                        | 50                                  |
| 20.0      | 0                         | 100                                 |

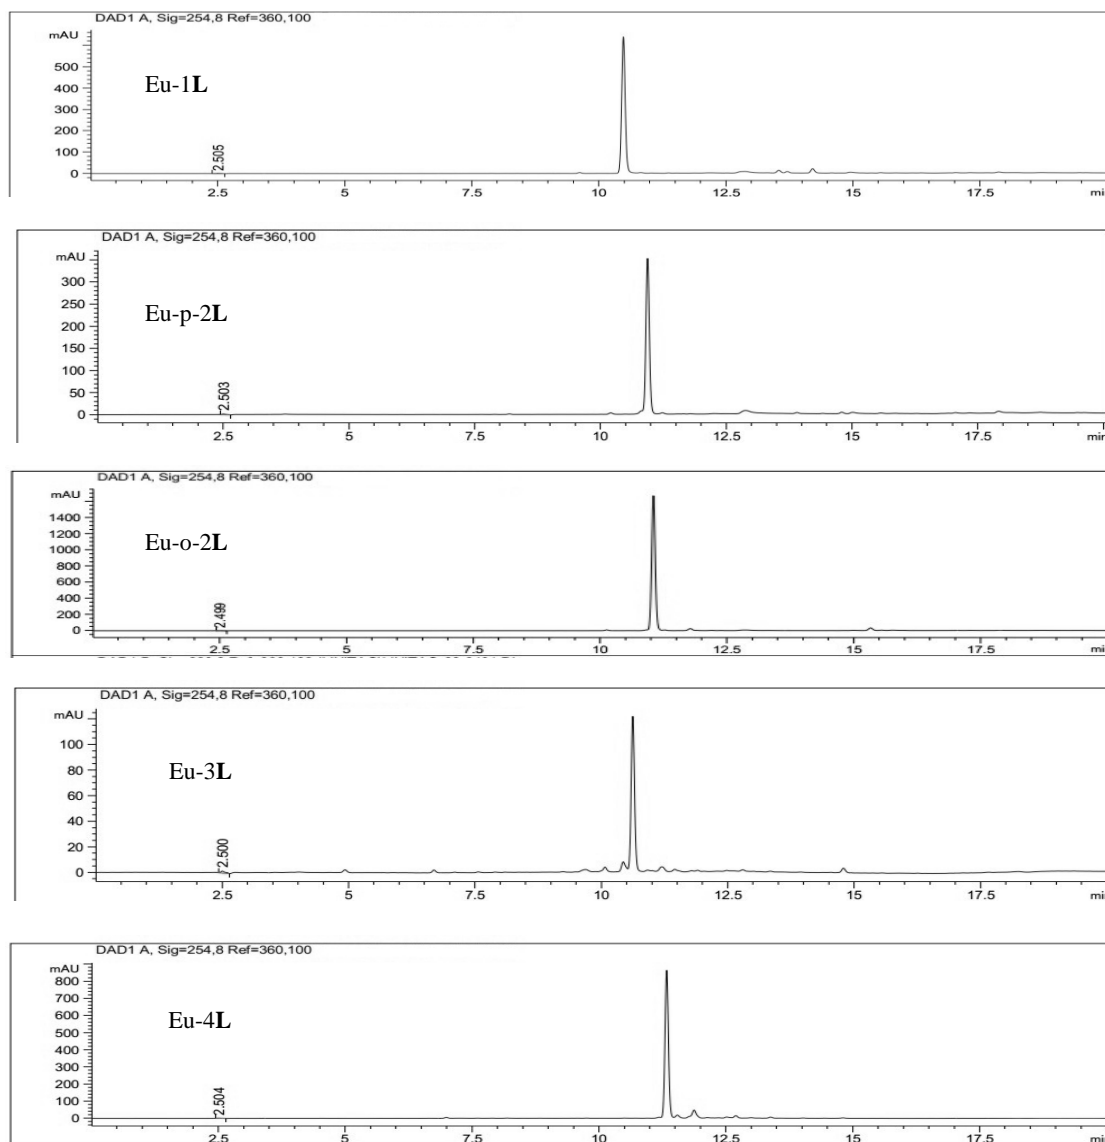

**Fig. S1** HPLC trace of Eu complexes. Experimental conditions: Agilent ZORBAX SB-C18 Stable Bond Analytical 4.6 X 150mm 5-micron, 1.0mL/min flow rate, Retention Time: Eu-1L in 10.48 min, Eu-p-2L in 10.93 min, Eu-o-2L in 11.04 min, Eu-3L in 10.62 min and Eu-4L in 11.33 min.

**FT-IR Spectral of Complexes Eu-nL (n = 1, o-2 and p-2) (neat, 298 K) (top: Eu-1L, middle: Eu-o-2L and bottom: Eu-p-2L)**

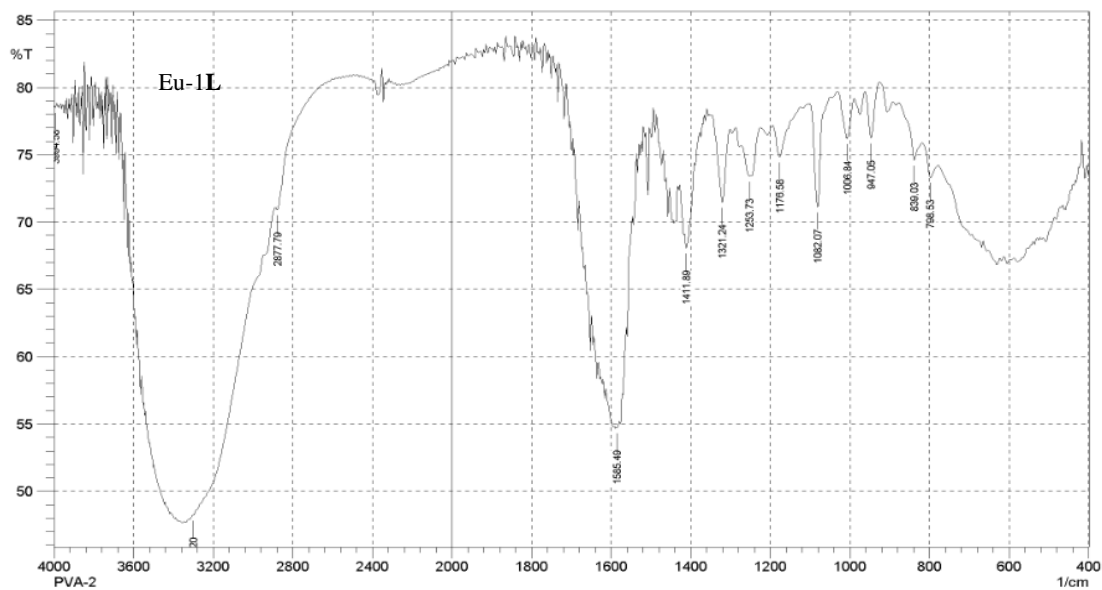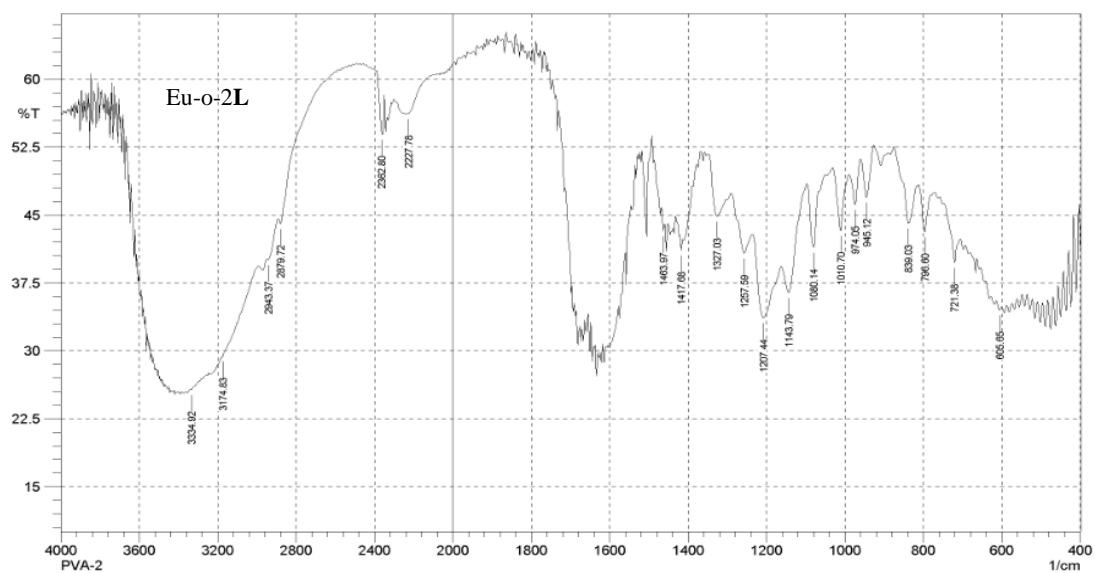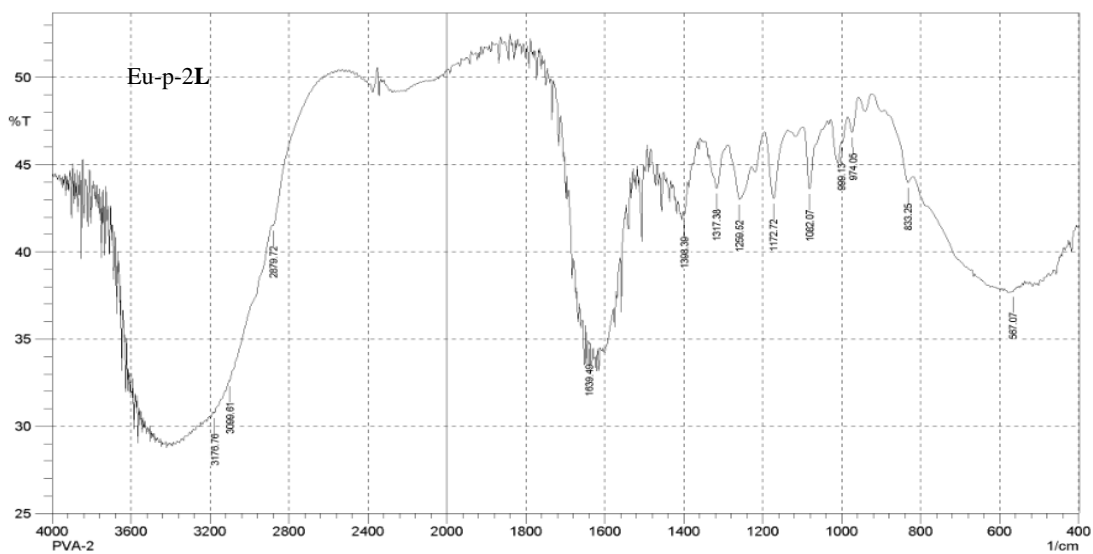

**FT-IR Spectral of Complexes Eu-nL (3 and 4) (neat, 298 K) (upper: Eu-3L; down: Eu-4L)**

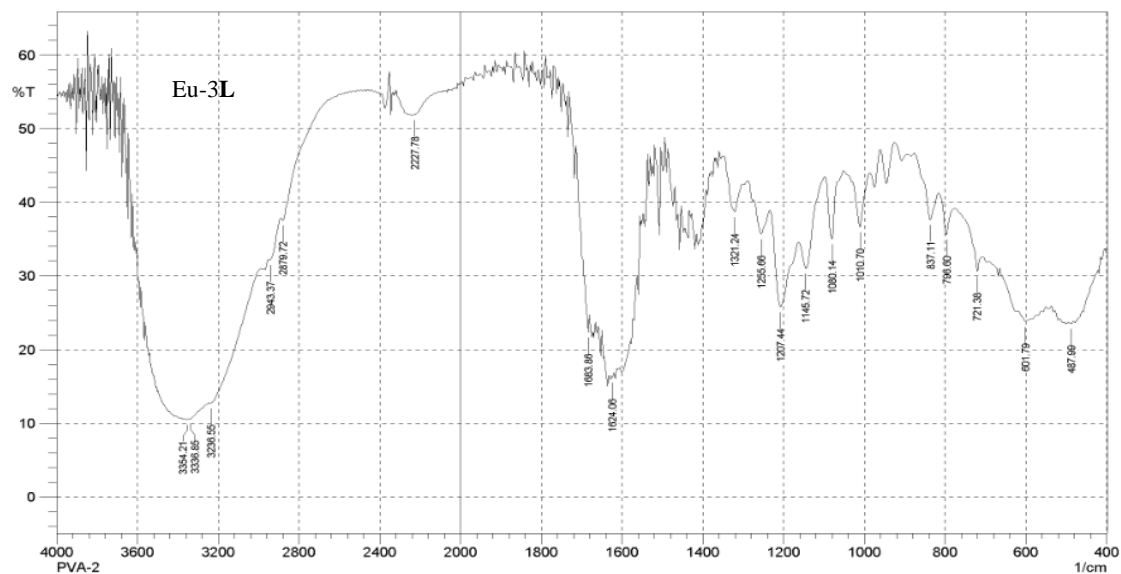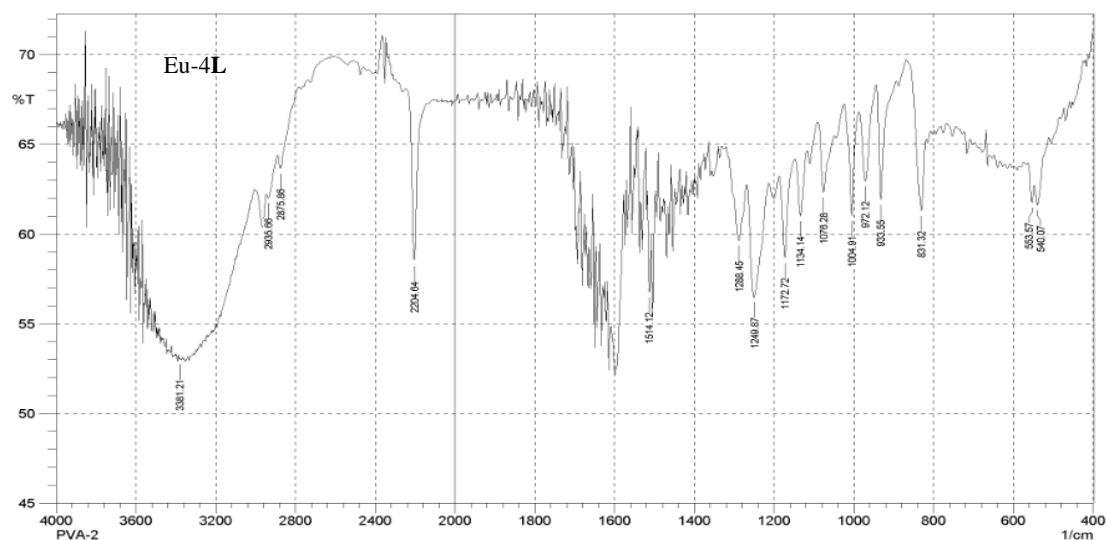



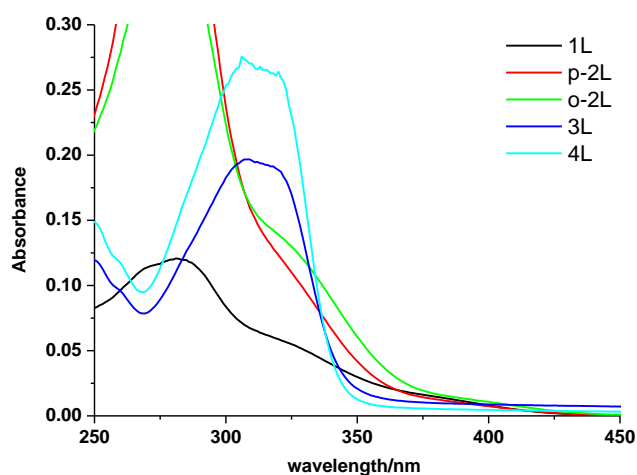

**Fig. S2** UV absorption spectra of ligand  $nL$  ( $n = 1, p-2, o-2, 3$  and  $4, 10 \mu M$ ) in aqueous solution.

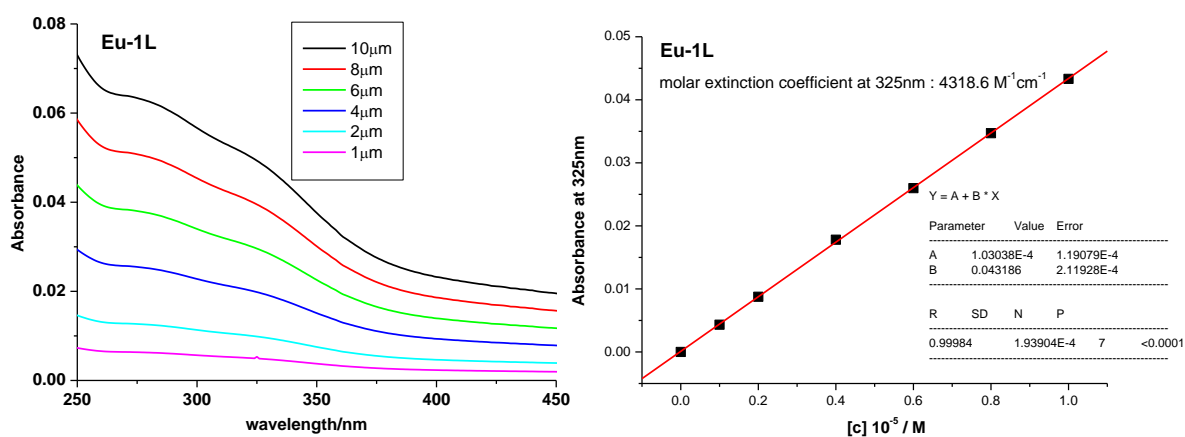

**Fig. S3** Left: UV absorption spectra of Eu-1L in various of concentrations in water. Right: linear fit of the Absorbance at 325nm *versus* concentration.

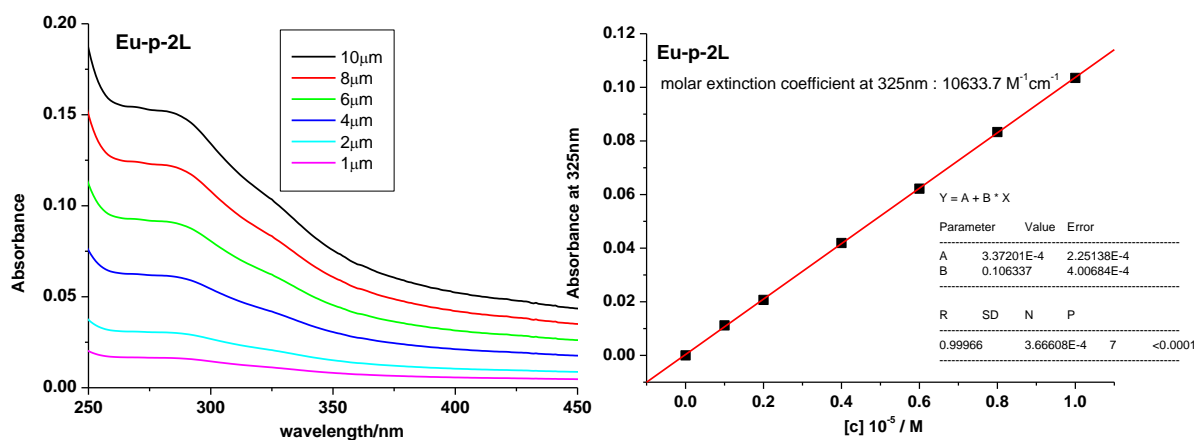

**Fig. S4** Left: UV absorption spectra of Eu-p-2L in various of concentrations in water. Right: linear fit of the Absorbance at 325nm *versus* concentration.

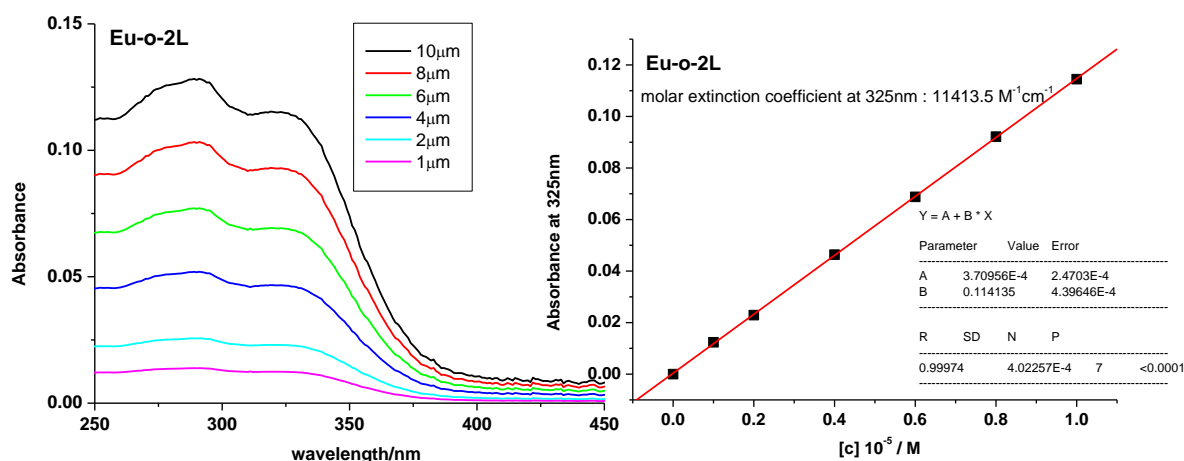

**Fig. S5** Left: UV absorption spectra of Eu-o-2L in various of concentrations in water. Right: linear fit of the Absorbance at 325nm *versus* concentration.

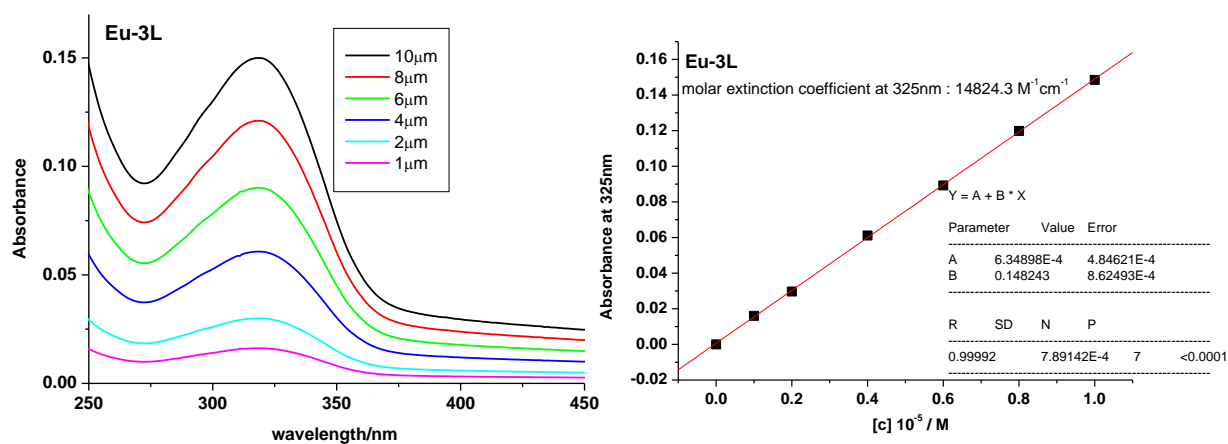

**Fig. S6** Left: UV absorption spectra of Eu-3L in various of concentrations in water. Right: linear fit of the Absorbance at 325nm *versus* concentration.

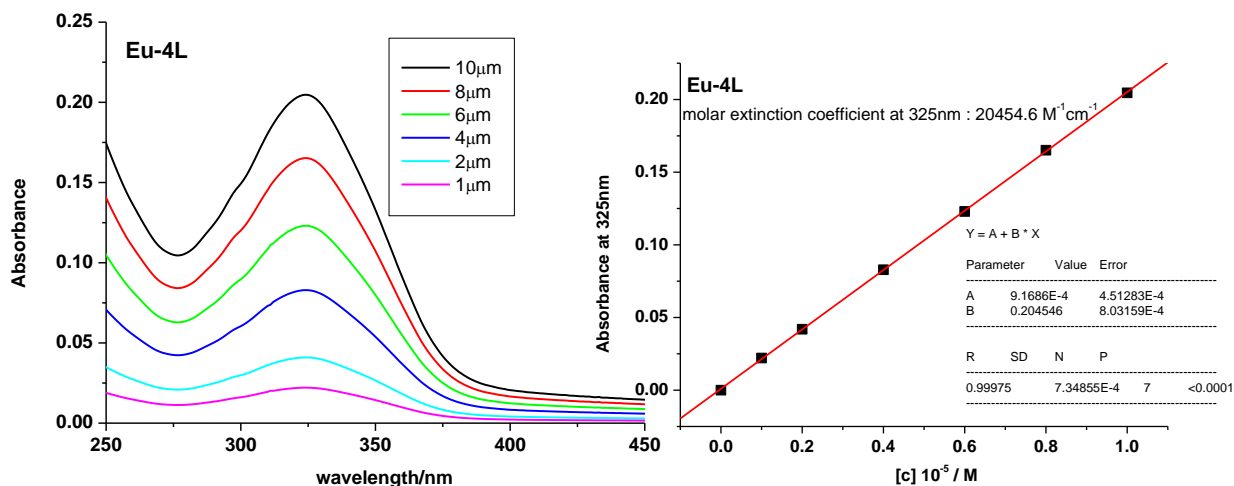

**Fig. S7** Left: UV absorption spectra of Eu-4L in various of concentrations in water. Right: linear fit of the Absorbance at 325nm *versus* concentration.

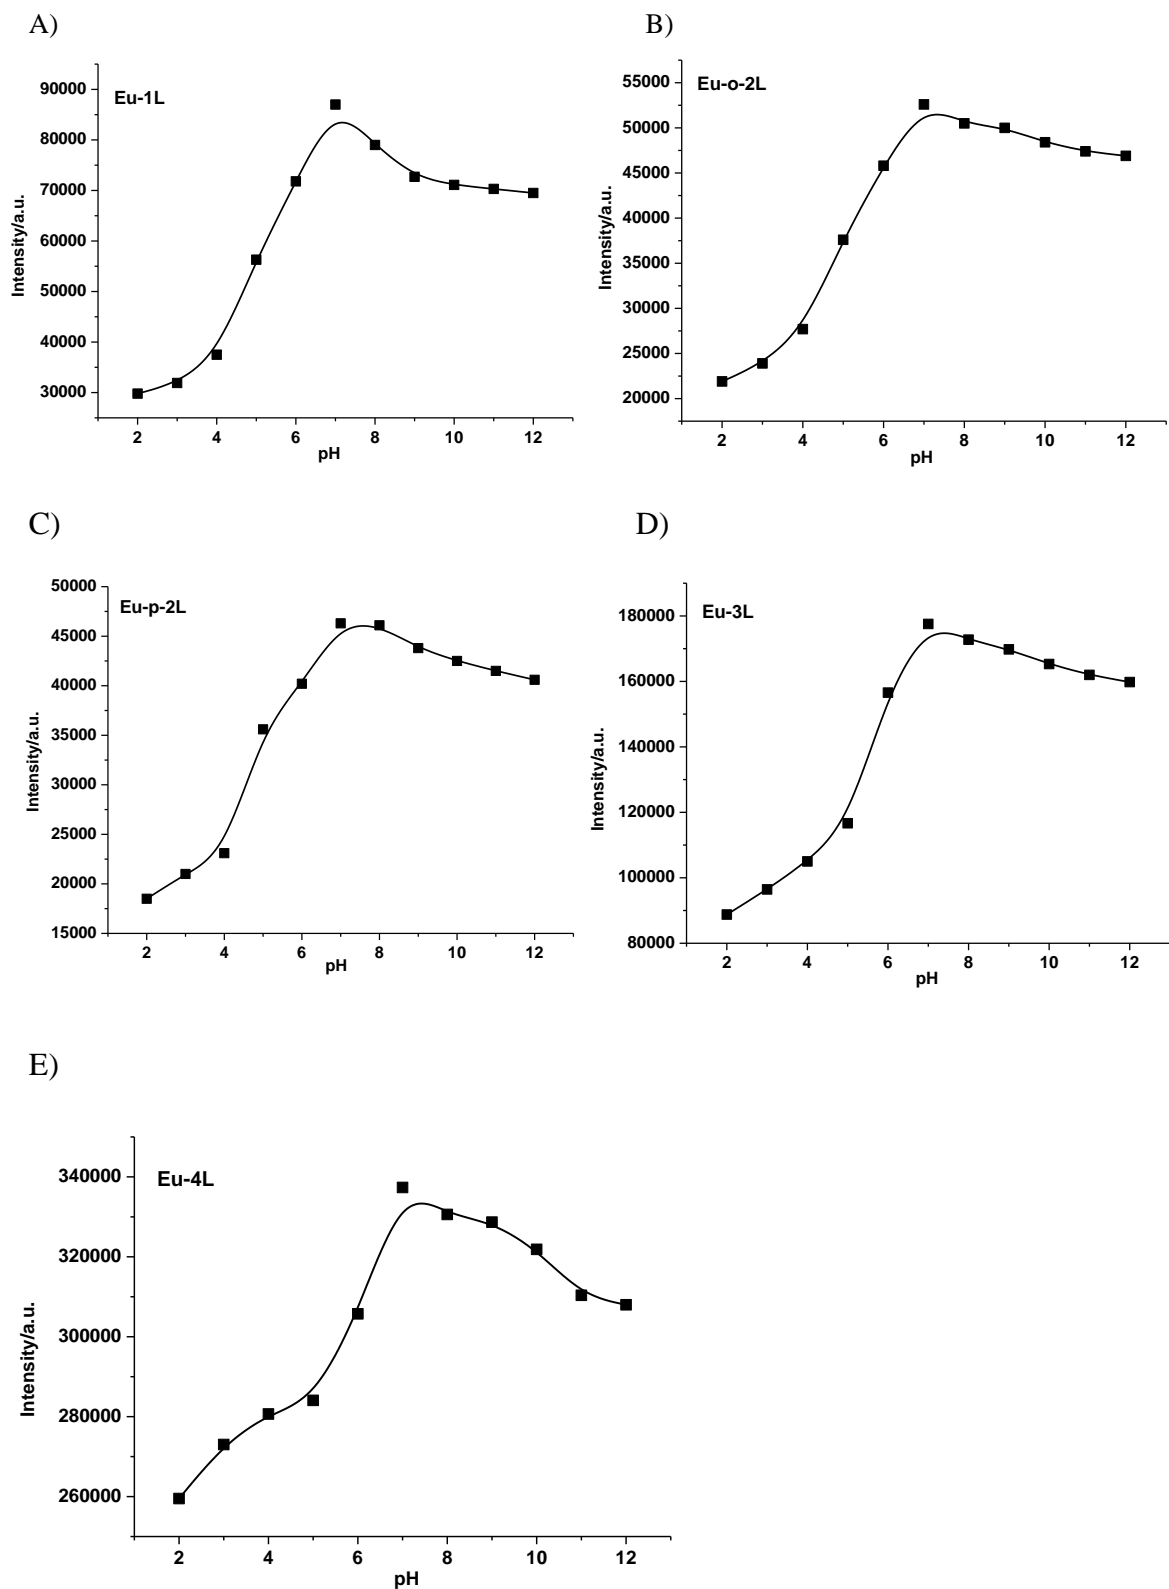

**Fig. S8** Plot of intensity ( $^5D_0$  to  $^7F_2$ ) versus pH of five europium complexes, showing the fit to the observed data for an apparent pKa. A): Eu-1L, pKa = 5.1; B): Eu-o-2L, pKa = 4.9; C): Eu-p-2L, pKa = 4.6; D): Eu-3L, pKa = 5.4; E): Eu-4L, pKa = 5.3.
